# Supplementary material
Source: publisher site journal article supplement (https://zoologia.pensoft.net/article/23539/download/suppl/33/)
Supplement: Supplementary file 1

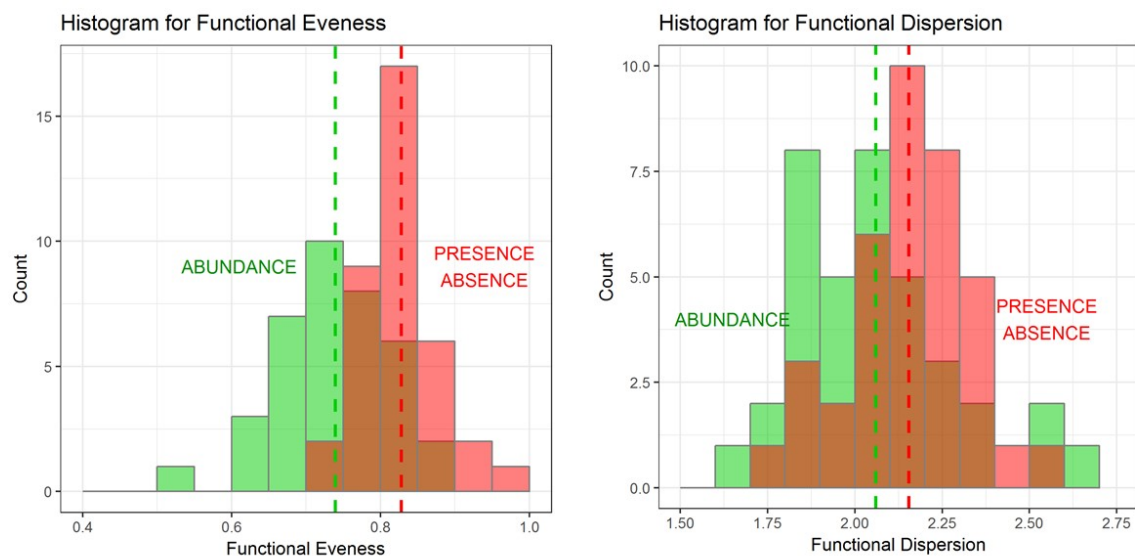

Supplementary File S3. Distribution of the observed values of the functional evenness (FEve) and dispersion (FDIs) index calculated with species abundance and only with presence/absence records of fish communities of the coastal lakes of the Tramandaí River Basin. Mean values (dashed lines) were analyzed by GLM (Generalized Linear Models). Results of the test:

| FEVE                 | Df | Sum of squares | Mean sq | Fvalue  | Pr(>F) |
|----------------------|----|----------------|---------|---------|--------|
| Abundance x Presence | 1  | 0.1466         | 0.1466  | 35.79   | 0.0007 |
| Residuals            | 72 | 0.2949         | 0.0041  |         |        |
|                      |    |                |         |         |        |
| FDIS                 | Df | Sum of squares | Mean sq | F value | Pr(>F) |
| Abundance x Presence | 1  | 0.1682         | 0.16823 | 3.964   | 0.0500 |
| Residuals            | 72 | 3.0557         | 0.04244 |         |        |
